# Supplementary material for: Adsorption performance of functionalized chitosan–silica hybrid materials toward rare earths
Source: Royal Society of Chemistry journal article supplement (doi:10.1039/c4ta04518a), 2014-01-01
Supplement: c4ta04518a1.pdf [file c4ta04518a1.pdf]

Electronic supplementary information (ESI)

**Adsorption Performance of Functionalized Chitosan-Silica Hybrid Materials toward  
Rare Earths**

Joris Roosen, Jeroen Spooren and Koen Binnemans

Table S1: TGA results and corresponding organic content by water correction.

|                               | <b>Residual mass</b><br>(%) | <b>LOI</b><br>(%) | <b>Organic content</b><br>(%) |
|-------------------------------|-----------------------------|-------------------|-------------------------------|
| C                             | 0.0                         | 100.0             | 94.0                          |
| Chitosan-silica <sup>i</sup>  | 73.5                        | 26.5              | 25.0                          |
| EDTA-CS                       | 68.9                        | 31.1              | 30.3                          |
| Chitosan-silica <sup>ii</sup> | 67.9                        | 32.1              | 25.8                          |
| DTPA-CS                       | 70.4                        | 29.6              | 28.2                          |

<sup>i</sup> A first batch of chitosan-silica was made to subsequently functionalize with EDTA.

<sup>ii</sup> A second batch chitosan-silica was made to subsequently functionalize with DTPA.

Table S2: ICP results and corresponding organic content.

|                               | <b>Silicon (Si) content</b><br>(%) | <b>Silica (SiO<sub>2</sub>) content</b><br>(%) | <b>Organic content</b><br>(%) |
|-------------------------------|------------------------------------|------------------------------------------------|-------------------------------|
| Chitosan-silica <sup>i</sup>  | 32.6                               | 69.8                                           | 30.2                          |
| EDTA-CS                       | 30.6                               | 65.5                                           | 34.5                          |
| Chitosan-silica <sup>ii</sup> | 34.5                               | 73.8                                           | 26.2                          |
| DTPA-CS                       | 32.2                               | 68.9                                           | 31.1                          |

<sup>i</sup> A first batch of chitosan-silica was made to subsequently functionalize with EDTA.

<sup>ii</sup> A second batch chitosan-silica was made to subsequently functionalize with DTPA.

Table S3: CHN results and corresponding organic content by calculation.

|                               | <b>C</b><br>(%) | <b>H</b><br>(%) | <b>N</b><br>(%) | <b>Organic content</b><br>(%) |
|-------------------------------|-----------------|-----------------|-----------------|-------------------------------|
| Chitosan                      | 41.11           | 7.90            | 7.45            | 100.0                         |
| Chitosan-silica <sup>i</sup>  | 9.08            | 1.40            | 1.60            | 22.1                          |
| EDTA-CS                       | 11.56           | 2.15            | 2.18            | 28.1                          |
| Chitosan-silica <sup>ii</sup> | 10.47           | 3.23            | 1.59            | 25.5                          |
| DTPA-CS                       | 12.28           | 3.37            | 2.14            | 29.8                          |

<sup>i</sup> A first batch of chitosan-silica was made to subsequently functionalize with EDTA.

<sup>ii</sup> A second batch chitosan-silica was made to subsequently functionalize with DTPA.
